# Supplementary figures and images for: Development of an Innovative Online Dietary Assessment Tool for France: Adaptation of myfood24
Source: MDPI journal article supplement (doi:10.3390/nu14132681), 2022-06-28

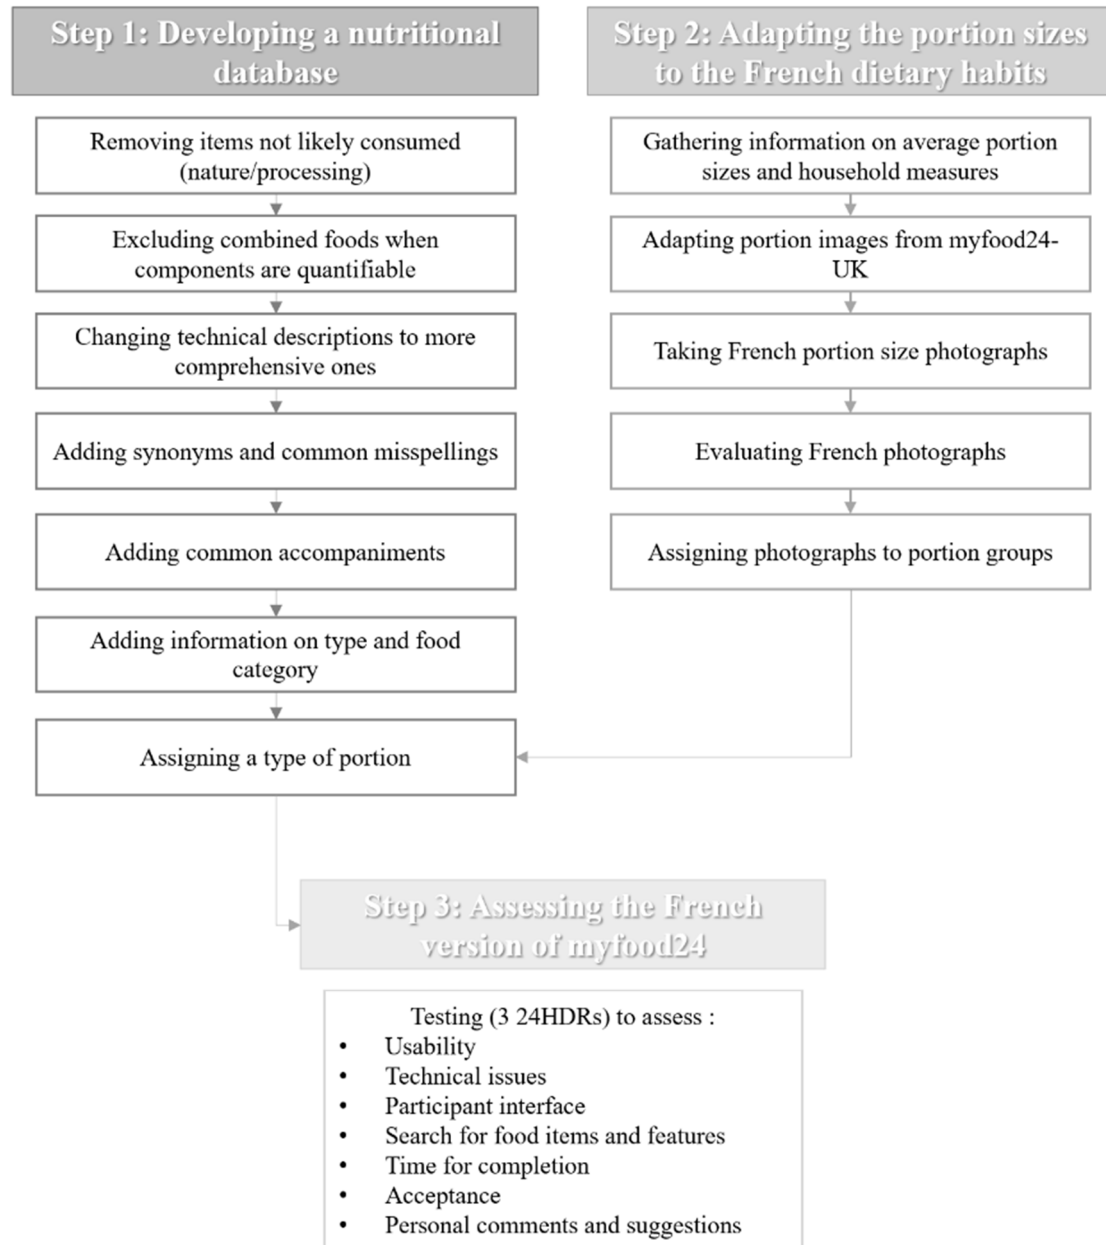

### Overview of the applied methodology of myfood24 France's development

Supplement: s1 [file s1]
